# Supplementary material
Source: PubMed Central journal article supplement (PMC3790504)
Supplement: supp_blood-2012-12-470971_blood-2012-12-470971-1.pdf [file supp_blood-2012-12-470971_blood-2012-12-470971-1.pdf]

**Secondary recipients ( $1 \times 10^7$  BM cells/recipient)**

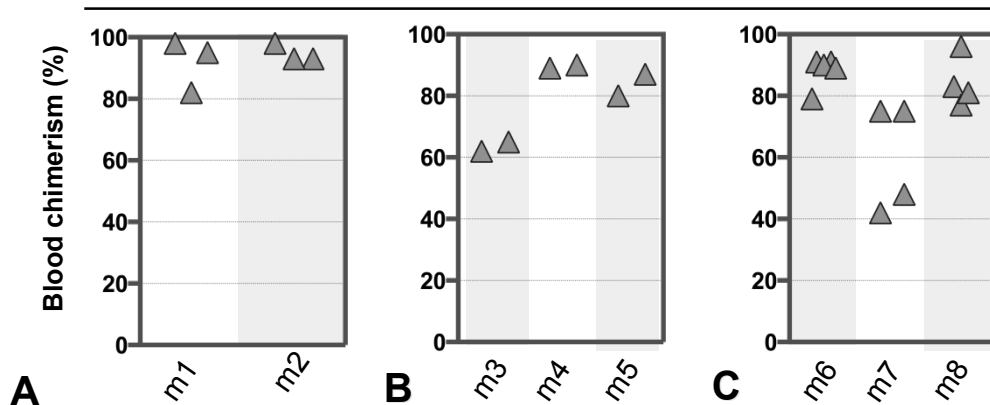

**Figure S1. Donor chimerism in peripheral blood of secondary recipients.**

Primary recipients which received transplants of fresh and cultured extra-embryonic vessels were analysed by secondary transplantations ( $1 \times 10^7$  nucleated bone marrow cells were transplanted per secondary recipient). (A) Uncultured VE-cad<sup>+</sup>CD45<sup>+</sup> cells isolated from UC+VV; (B) UC explants; (C) VV explants. Donor engraftment in peripheral blood of secondary recipients assessed after 12-14 weeks is shown.

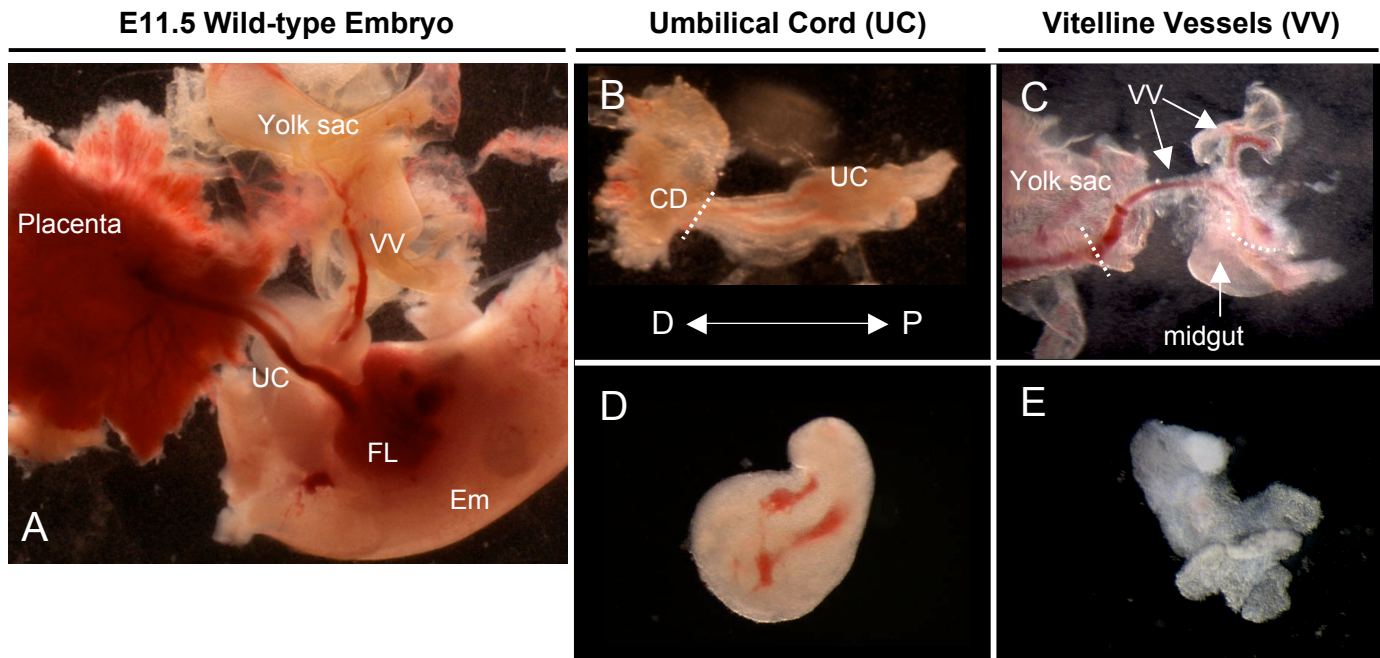

**Figure S2. Dissection and culture of extra-embryonic vessels.**

(A) E11.5 wild-type embryo: UC; VV; fetal liver (FL); embryo proper (Em); yolk sac and placenta are shown immediately prior to their isolation.

(B, C) UC and VV after dissection, respectively (CD, chorion disk; D, distal; P, proximal).

(D, E) UC and VV after 4 days culture with GF (IL3+SCF+Flt3L).

Original magnification: A, 8x; B,C 32x; D,E 40x. White dotted lines indicated points of dissection to isolate vessels.

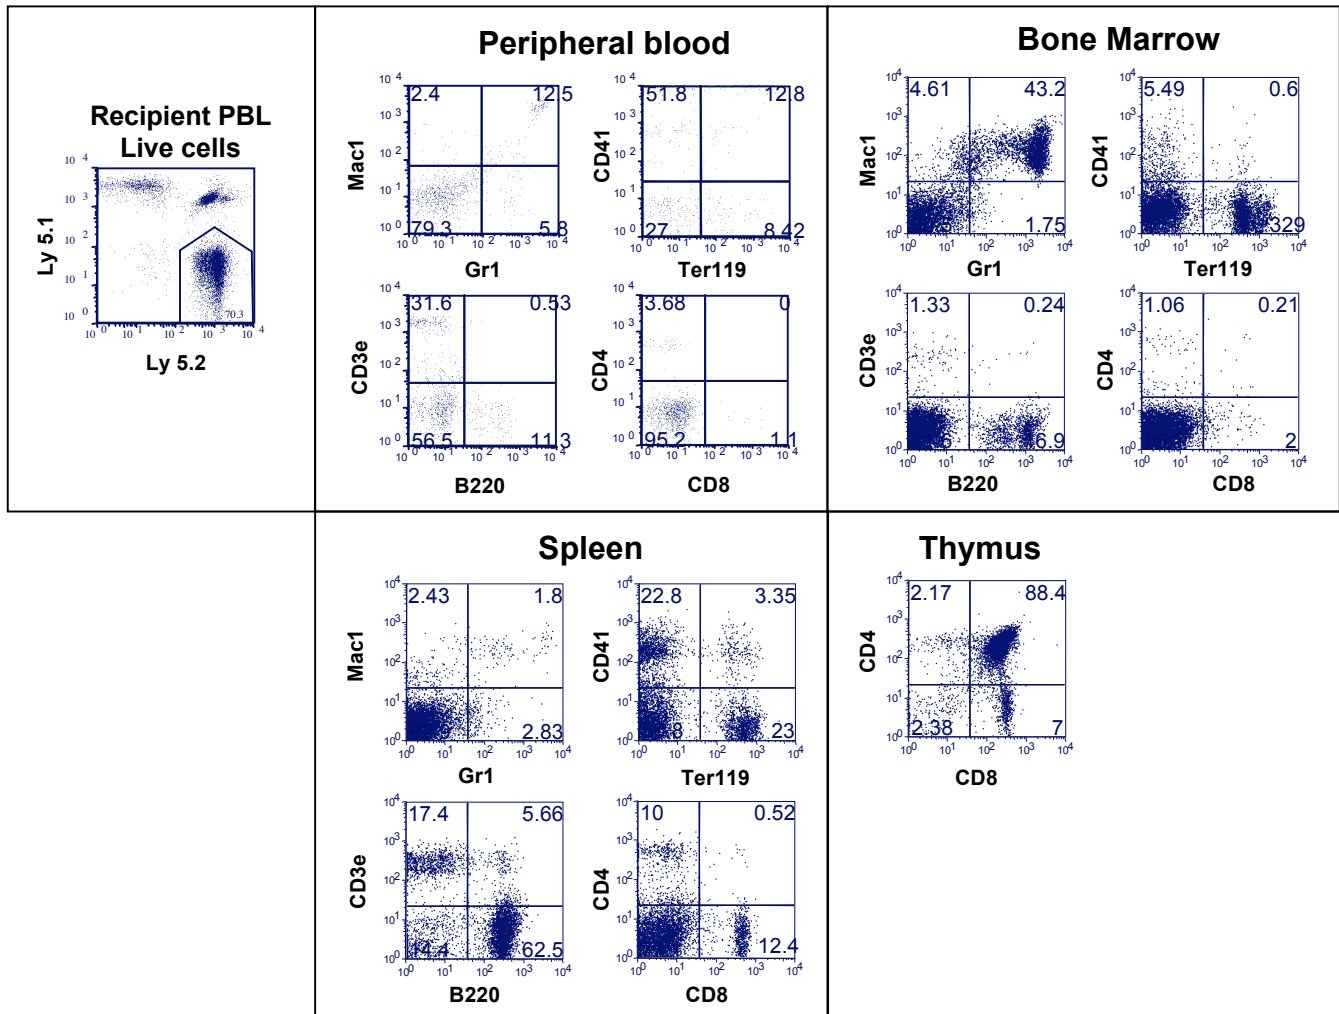

**Figure S3. Multilineage analysis of engrafted UC derived HSCs.**

Dots plots are representative of donor derived myeloid, erythroid and lymphoid cell populations in peripheral blood, bone marrow, spleen and thymus.

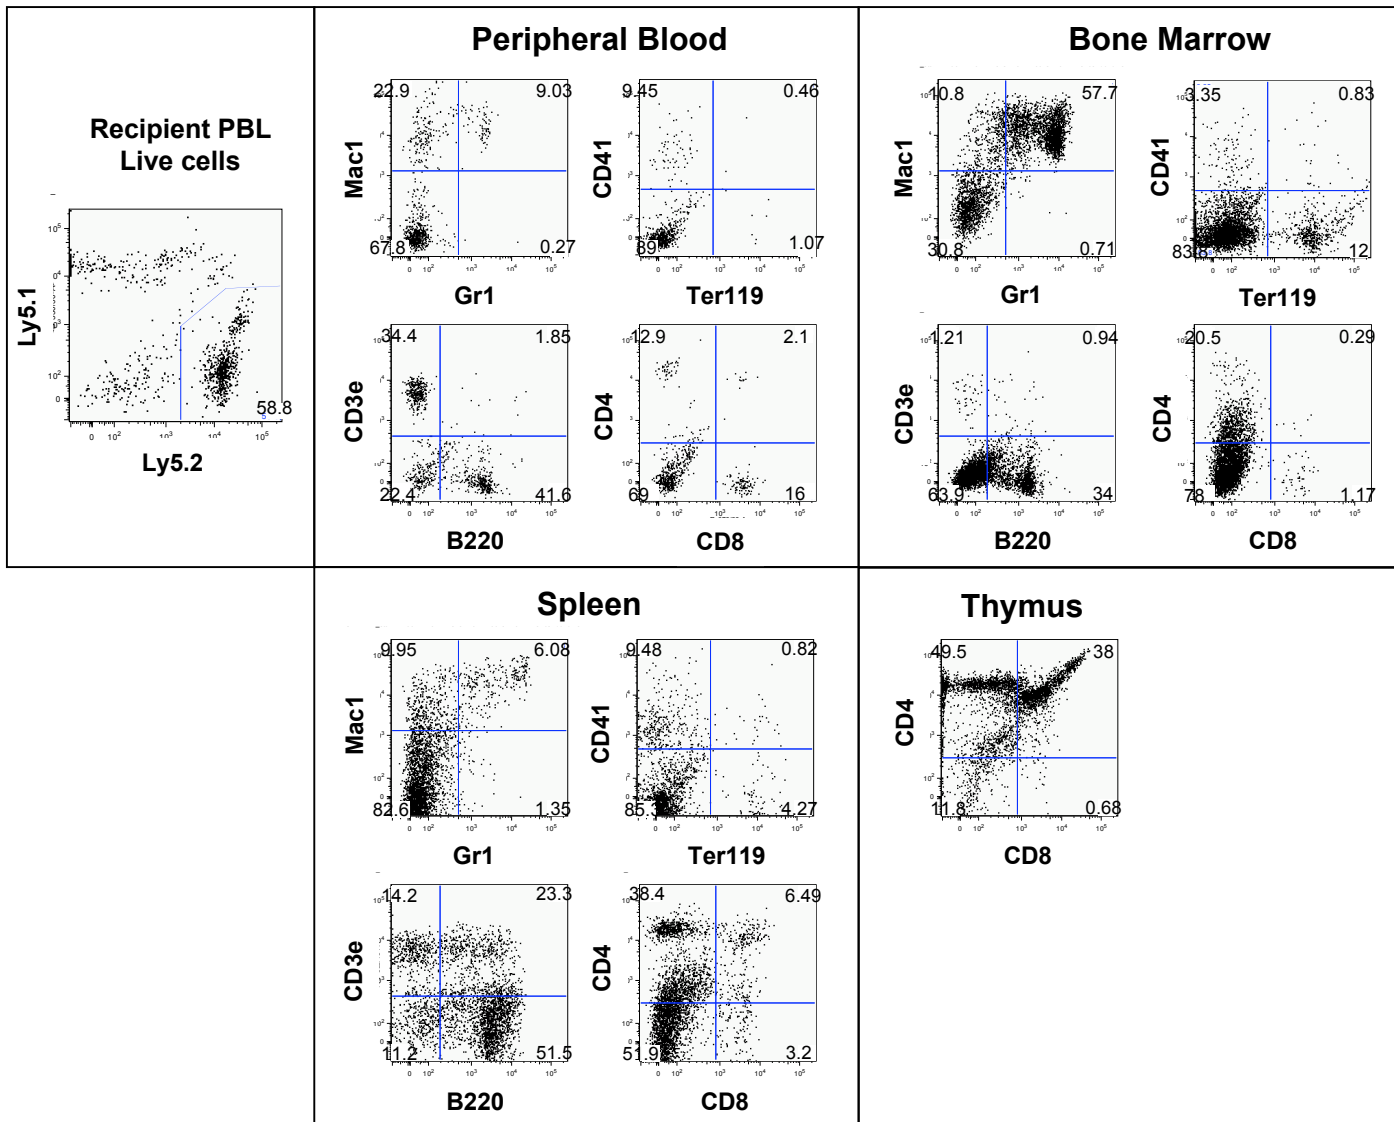

**Figure S4. Multilineage analysis of engrafted VV derived HSCs.**

Dots plots are representative of donor derived myeloid, erythroid and lymphoid cell populations in peripheral blood, bone marrow, spleen and thymus.

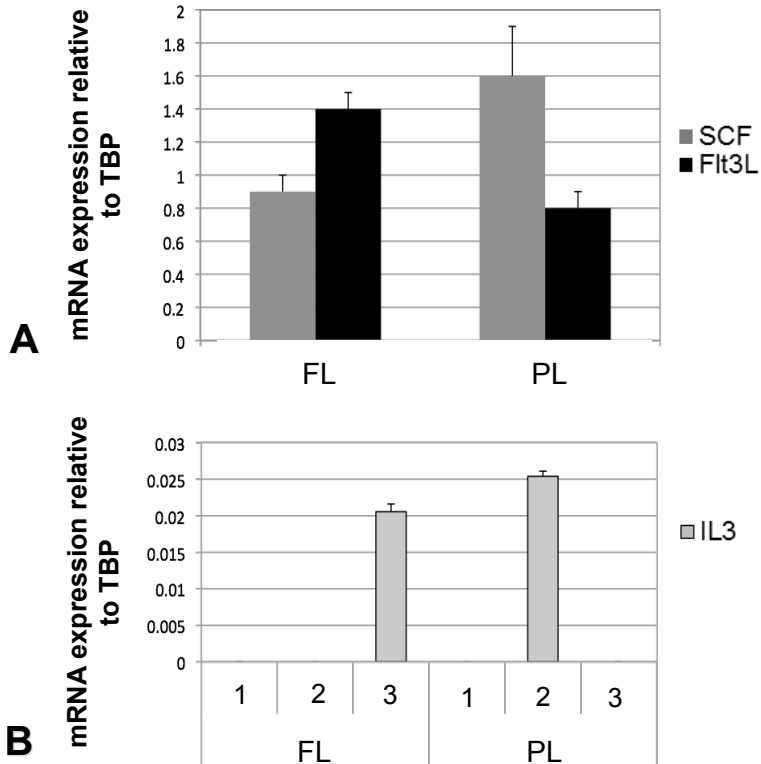

**Figure S5. Expression of growth factors in freshly isolated E11.5 tissues.**

(A) Expression of SCF and Flt3L mRNA in freshly dissected E11.5 foetal livers (FL) or placentas (PL), relative to TBP housekeeping gene. Standard deviations of 3 independent samples are shown.

(B) Expression of IL3 mRNA in several freshly dissected FL or PL, relative to TBP housekeeping gene. 3 independent samples were analysed separately (labeled 1, 2, 3).

FL, foetal liver; PL, placenta.

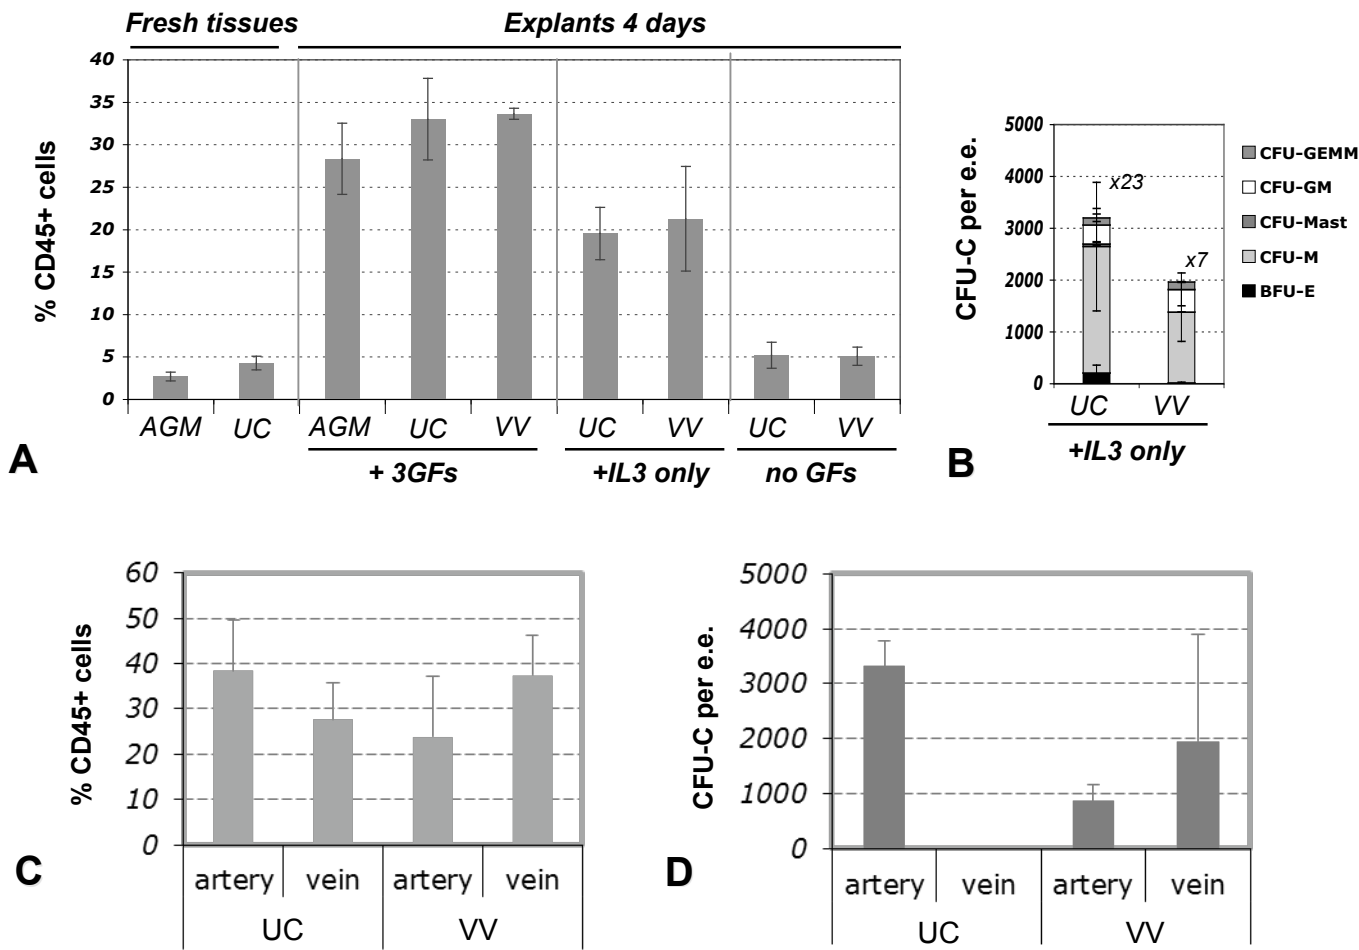

**Figure S6. Expansion of CD45<sup>+</sup> cells and CFU-C progenitors in explants of extra-embryonic vessels.**

(A) Percentage of CD45<sup>+</sup> cells in fresh tissues or explants cultured for 4 days in the presence of 3 growth factors (SCF, IL3, Flt3L 100ng/ml), with IL3 only (200ng/ml), or without growth factors. Standard errors are shown; (n=2-6 independent experiments).

(B) Number of CFU-C (per embryo equivalent) after 4 days explant culture with IL3 alone. Shown is the fold increase in CFU-C in explants relative to their fresh uncultured counterparts.

(C) Percentage of CD45<sup>+</sup> cells in explants of veins or arteries isolated from UC or VV, after 4 days culture with 3 growth factors (SCF, Flt3L, IL3 100ng/ml); (n=5-6 independent experiments).

(D) CFU-C per embryo equivalent in explants of veins or arteries isolated from UC or VV, after 4 days culture with 3 growth factors (SCF, Flt3L, IL3 100ng/ml); (n=2-3 independent experiments).

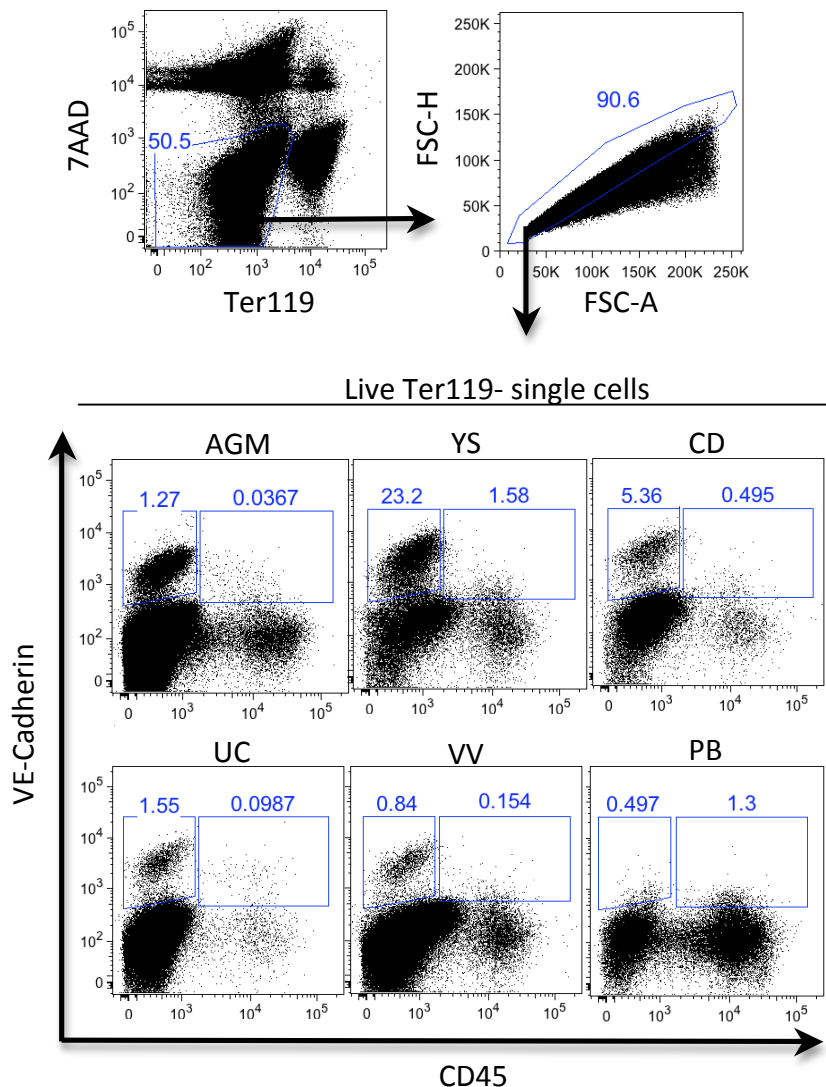

**Figure S7. Sorting VE-cadherin<sup>+</sup>CD45<sup>-</sup> cells from E11.5 tissues.**

E11.5 tissues were dissected, dissociated and stained before isolation of live Ter119<sup>-</sup> VE-cadherin<sup>+</sup>CD45<sup>-</sup> cells by FACS. Shown are gating strategies for AGM, yolk sac (YS), chorion disk (CD), umbilical cord (UC), vitelline vessels (VV) and peripheral blood (PB).
